# Supplementary material for: Serotonin signals through a gut-liver axis to regulate hepatic steatosis
Source: PubMed Central journal article supplement (PMC6240035; doi:10.1038/s41467-018-07287-7), 2018-11-16
Supplement: 41467_2018_7287_MOESM1_ESM.pdf [file 41467_2018_7287_MOESM1_ESM.pdf]

## **Supplementary Information**

**Serotonin signals through a gut-liver axis to regulate hepatic steatosis**

**Choi et al.**

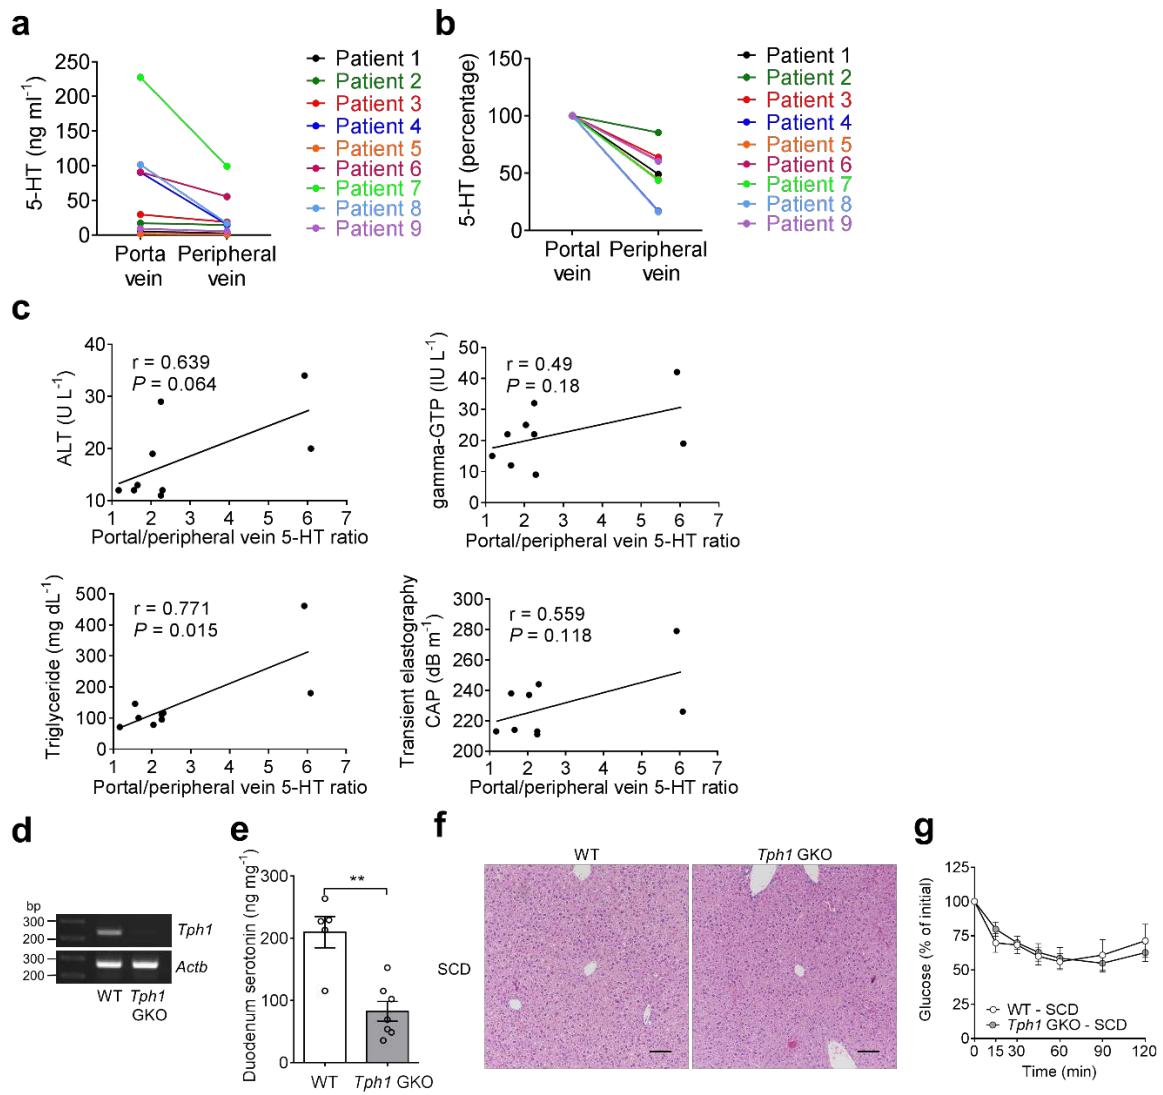

**Supplementary Figure 1. Inhibiting gut-derived 5-HT does not affect hepatic lipid metabolism in SCD-fed mice.** (a) Plasma 5-HT concentrations of portal blood and peripheral blood in humans. n = 9 per group. (b) Plasma 5-HT concentrations of portal blood and peripheral blood in humans. Portal blood concentration set as 100%. n = 9 per group. (c) Scatter plots of values for portal/peripheral blood 5-HT ratio versus ALT, gamma-GTP, TG and transient elastography CAP in humans. n = 9 per group. These data were compared with one another by calculation of the Pearson's *r* correlation coefficient. (d) Representative RT-PCR data of *Tph1* gene expression in duodenum from 20 week old WT and *Tph1* GKO mice. (e) Duodenal 5-HT levels in WT and *Tph1* GKO mice. n = 5-7 per group. (f) Representative liver histology by H&E staining from SCD fed WT and *Tph1* GKO mice. (g) Intraperitoneal insulin tolerance test (IPITT) after 4 h fasting of SCD fed WT and *Tph1* GKO mice. n = 5 per group. Scale bars, 100µm. Data are expressed as the means ± standard error of the mean (SEM). \**P*<0.5, \*\**P*<0.01, \*\*\**P*<0.001, Student's *t*-test (e, g).

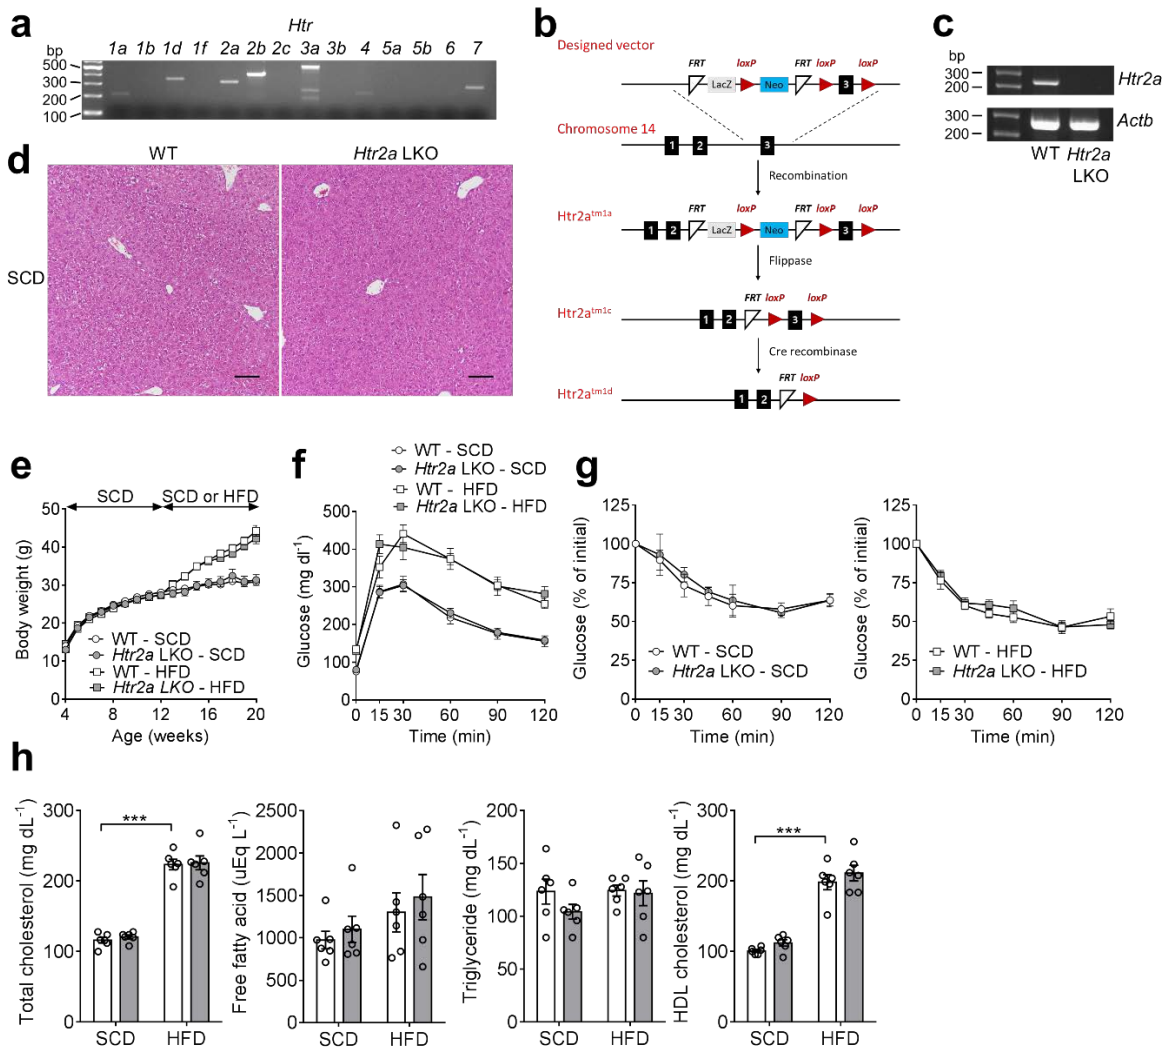

**Supplementary Figure 2. Liver-specific deletion of *Htr2a* does not affect systemic energy metabolism.**

(a) mRNA expression of *Htrs* as assessed by RT-PCR in liver from 8 week old C57BL/6J mice. (b) Schematic of gene targeting strategy to generate the *Htr2a* floxed allele. (c) Representative RT-PCR data of *Htr2a* gene expression in liver from 20 week old WT and *Htr2a* LKO mice. (d-h) 12 week old WT and *Htr2a* LKO mice were fed SCD or HFD for 8 weeks. (d) Representative liver histology by H&E staining from SCD fed WT and *Htr2a* LKO mice. Scale bars, 100 $\mu$ m. (e) Body weight trend. n = 6-10 per group. (f) Intraperitoneal glucose tolerance test (IPGTT) after 16 h fasting. n = 6 per group. (g) Intraperitoneal insulin tolerance test (IPITT) after 4 h fasting. n = 6 per group. (h) Plasma total cholesterol, free fatty acid, triglyceride, and HDL cholesterol levels. n = 6 per group. Data are expressed as the means  $\pm$  standard error of the mean (SEM). \**P*<0.5, \*\**P*<0.01, \*\*\**P*<0.001, Student's *t*-test (g) or one-way ANOVA with *posthoc* Tukey's test (e,f,h).

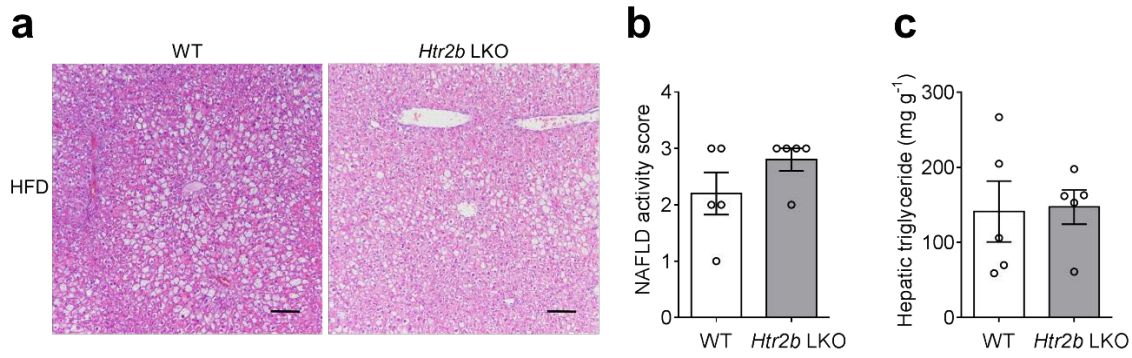

**Supplementary Figure 3. HTR2B does not mediate the lipogenic action of GDS in the liver.** (a-c) 12 week old mice were fed HFD for 8 weeks. (a) Representative liver histology by H&E staining from HFD fed WT and *Htr2b* LKO mice. Scale bars, 100 $\mu$ m. (b) NAFLD activity scores of HFD fed WT and *Htr2b* LKO mice. n = 5 per group. (c) Hepatic triglyceride levels. n = 5 per group.

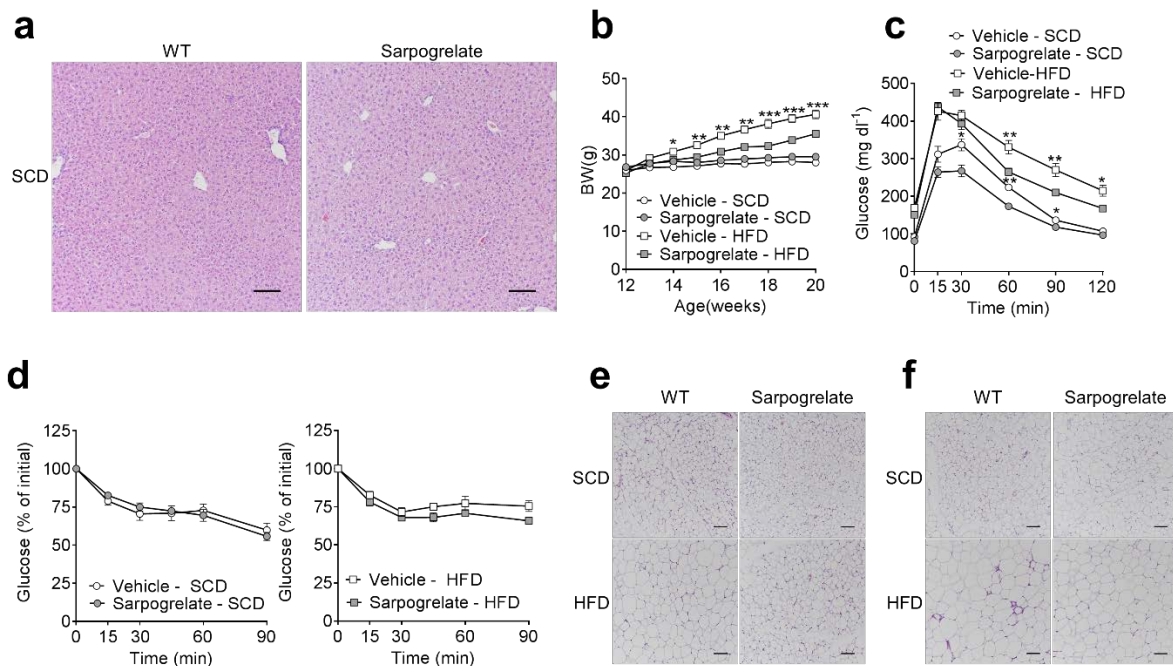

**Supplementary Figure 4. HTR2A antagonist ameliorates HFD-induced obesity.** (a-f) 12 week old mice were fed SCD or HFD for 8 weeks and were treated with vehicle or sarpogrelate daily per os. (a) Representative liver histology by H&E staining from SCD fed vehicle and sarpogrelate treated mice. Scale bars, 100 $\mu$ m. (b) Body weight trend. n = 5-6 per group. (c) Intraperitoneal glucose tolerance test (IPGTT) after 16 h fasting. n = 5-6 per group. (d) Intraperitoneal insulin tolerance test (IPITT) after 4 h fasting. n = 5-6 per group. (e, f) Representative iWAT (e) and eWAT (f) histology by H&E staining. Scale bars, 100 $\mu$ m. Data are expressed as the means  $\pm$  standard error of the mean (SEM). \* $P$ <0.5, \*\* $P$ <0.01, \*\*\* $P$ <0.001, Student's  $t$ -test (d) or one-way ANOVA with *posthoc* Tukey's test (b,c).

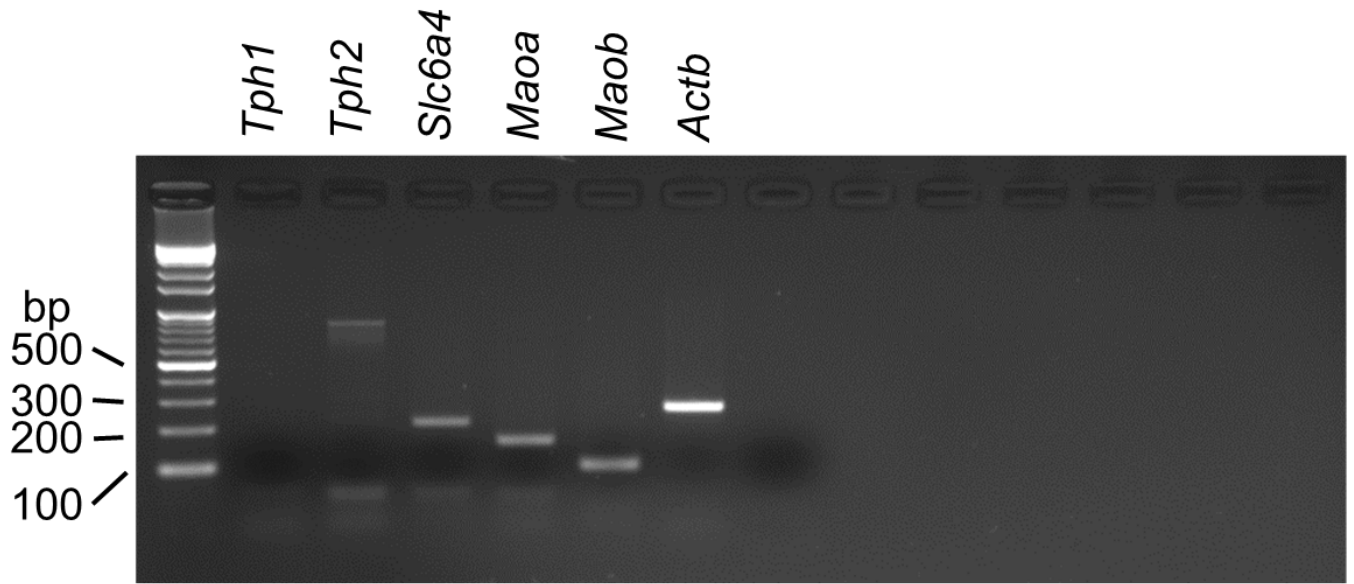

**Supplementary Figure 5. Uncropped gel photo shown in Figure 1.**

**Supplementary Table 1. List of primers used in this study.**

| Gene name      | Forward primer (5' to 3') | Reverse primer (5' to 3') |
|----------------|---------------------------|---------------------------|
| <i>Acaca</i>   | CAGTAACCTGGTGAAGCTGGA     | GCCAGACATGCTGGATCTCAT     |
| <i>Acat1</i>   | CCCCATTGATTTTCCACTTG      | AGCACAACCACACTGAATGC      |
| <i>Acox1</i>   | CACGGCTATTCTCACAGCAG      | CAGGCTGTTAATGTCCACCA      |
| <i>Actb</i>    | GGTACCACCATGTACCCAGG      | GAAAGGGTGTAACGCAGC        |
| <i>Agpat1</i>  | GCGCAATGTGAGAACATGA       | TCATTCCAAGCAGGTCGAGG      |
| <i>Apob</i>    | TACTTCCACCCACAGTCCCCT     | CCTTAGAAGCCTTGGGCACAT     |
| <i>Cd36</i>    | TGGCCAAGCTATTGCGACAT      | ACACAGCGTAGATAGACCTGC     |
| <i>Coll1a1</i> | ACATGTTTCAGCTTTGTGGACC    | TAGGCCATTGTGTATGCAGC      |
| <i>Col3a1</i>  | GGAACCTGGTTTCTTCTCACC     | TAGGACTGACCAAGGTGGCT      |
| <i>Col4a1</i>  | GTCTGGCTTCTGCTGCTCTT      | CACATTTTCCACAGCCAGAG      |
| <i>Cpt1a</i>   | AGCTCGCACATTACAAGGACA     | CCAGCACAAAGTTGCAGGAC      |
| <i>Fabp1</i>   | TGAAGGCAATAGGTCTGCCC      | GTCATGGTCTCCAGTTCGCA      |
| <i>Fabp2</i>   | CTTCGGGAACCACAGGTCTTC     | CATAGCAAGGCTGTCCCATAC     |
| <i>Fasn</i>    | AAGCGGTCTGGAAAGCTGAA      | AGGCTGGGTTGATACCTCCA      |
| <i>Fatp5</i>   | TTCGAAAGAACCAACCCTTCTT    | GCGTCGTACATTCGCAACAA      |
| <i>F4/80</i>   | TCAAGGACACGAGGT TGCTGA    | CCAAGGGGCCAATCTGGAA       |
| <i>Gpat1</i>   | CCACAGAGCTGGGAAAGGTT      | GTGCCTTGTGTGCGTTTCAT      |
| <i>Htr1a</i>   | TCAGCTACCAAGTGATCACCTCT   | GTCCACTTGTTGAGCACCTG      |
| <i>Htr1b</i>   | TGCTCCTCATCGCCCTCTATG     | CTAGCGGCCATGAGTTTCTTCTT   |
| <i>Htr1d</i>   | CCTCCAACAGATCCCTGAATG     | CAGAGCAATGACACAGAGATGCA   |
| <i>Htr1f</i>   | TGTGAGAGAGAGCTGGATTATGG   | TAGTTCCTTGGTGCCTCCAGAA    |
| <i>Htr2a</i>   | AGCTGCAGAATGCCACCAACTAT   | GGGATTGGCATGGATATACCTAC   |
| <i>Htr2b</i>   | AAATAAGCCACCTCAACGCCT     | TCCCGAAATGTCTTATTGAAGAG   |
| <i>Htr2c</i>   | TTCTTAATGTCCCTAGCCATTGC   | GCAATCTTCATGATGGCCTTAGT   |
| <i>Htr3a</i>   | AAATCAGGGCGAGTGGGAGCTG    | GACACGATGATGAGGAAGACTG    |
| <i>Htr3b</i>   | CGTGTGGTACCGAGAGGTTT      | GGATGGGCTTGTGGTTTCTA      |
| <i>Htr4</i>    | ATGGACAACTTGATGCTAATGTGA  | TCACCAGCACCGAAACCAGCA     |

|                |                          |                         |
|----------------|--------------------------|-------------------------|
| <i>Htr5a</i>   | GATTGACTTCAGTGGGCTCG     | AAAGTCAGGACTAGCACTCG    |
| <i>Htr5b</i>   | GGAGCCTTCTACCTGCCTCT     | ATGAGCTCCGTCAGGAAGAA    |
| <i>Htr6</i>    | CCTCACATGGCTGGGATACT     | ATCTGAGTTGGGTGGCAGAG    |
| <i>Htr7</i>    | CTCGGTGTGCTTTGTCAAGA     | TTGGCCATACATTTCCCATT    |
| <i>Maoa</i>    | GCGGTACAAGGGTCTGTTC      | CAGCCAATCCTGAGATGCCG    |
| <i>Maob</i>    | GGGCGGCATCTCAGGTATGG     | AAGTCCTGCCTCCTACACGG    |
| <i>Mcad</i>    | GGTTTGGCTTTTGGACAATG     | TGACGTGTCCAATCTACCACA   |
| <i>Mcp1</i>    | GGCTCAGCCAGATGCAGTTAA    | AGCCTACTCATTGGGATCATCTT |
| <i>Mogat1</i>  | TTGACCCATGGTGCCAGTTT     | GTGGCAAGGCTACTCCCATT    |
| <i>Mtp</i>     | TCTCACAGTACCCGTTCTT      | TCTTCTCCGAGAGACATATCC   |
| <i>Ppara</i>   | AGAAGTTGCAGGAGGGGATT     | TCGGACTCGGTCTTCTTGAT    |
| <i>Pparg</i>   | GGTGTGATCTTAACTGCCGGA    | GCCCAAACCTGATGGCATTG    |
| <i>Slc6a4</i>  | CGCAGTTCCCAGTACAAGC      | GAAGGCCCTCCACCATTCTG    |
| <i>Srebp1c</i> | GGAGCCATGGATTGCACATT     | GGCCCGGGAAGTCACTGT      |
| <i>Tgfb1</i>   | GGGCTACCATGCCAACTTCTG    | GAGGGCAAGGACCTTGCTGTA   |
| <i>Timp1</i>   | CCCTGCTCAGCAAAGAGC       | TCACTCTCCAGTTTGCAAGG    |
| <i>Tph1</i>    | ACCATGATTGAAGACAACAAGGAG | TCAACTGTTCTCGGCTGATG    |
| <i>Tph2</i>    | GCCATGCAGCCCGCAATGATGATG | CAACTGCTGTCTTGCTGCTC    |
| <i>Ucp1</i>    | CTTTGCCTCACTCAGGATTGG    | ACTGCCACACCTCCAGTCATT   |



**Supplementary Table 2. Clinical characteristics of study participants.**

| <b>Patient</b>                              | <b>1</b> | <b>2</b> | <b>3</b> | <b>4</b> | <b>5</b> | <b>6</b> | <b>7</b> | <b>8</b> | <b>9</b> |
|---------------------------------------------|----------|----------|----------|----------|----------|----------|----------|----------|----------|
| <b>Age</b>                                  | 21       | 24       | 37       | 48       | 58       | 37       | 42       | 36       | 53       |
| <b>Sex</b>                                  | Male     | Male     | Male     | Male     | Male     | Male     | Female   | Male     | Female   |
| <b>Height (m)</b>                           | 1.76     | 1.74     | 1.78     | 1.7      | 1.62     | 1.85     | 1.62     | 1.68     | 1.61     |
| <b>Weight (kg)</b>                          | 75       | 65       | 75       | 74       | 53       | 81       | 63       | 68       | 53.5     |
| <b>BMI(kg m<sup>-2</sup>)</b>               | 24.21    | 21.47    | 23.67    | 25.61    | 20.2     | 23.67    | 24.01    | 24.1     | 20.64    |
| <b>Hb (g dL<sup>-1</sup>)</b>               | 16.9     | 15.5     | 15.2     | 15.4     | 13.3     | 15.4     | 10.3     | 14.1     | 13.9     |
| <b>WBC (10<sup>3</sup> uL<sup>-1</sup>)</b> | 5        | 5.02     | 7.37     | 8.46     | 6.57     | 5.72     | 7.47     | 5.7      | 5.69     |
| <b>Seg (%)</b>                              | 46.3     | 64.9     | 62.4     | 55.9     | 59.6     | 49.7     | 74.4     | 57.1     | 37.3     |
| <b>Lymph (%)</b>                            | 44.1     | 27.1     | 27.4     | 32.4     | 30.5     | 37.6     | 18.5     | 33.9     | 45       |
| <b>PLT (10<sup>3</sup> uL<sup>-1</sup>)</b> | 200      | 255      | 219      | 270      | 239      | 281      | 327      | 276      | 253      |
| <b>Ca (mg dL<sup>-1</sup>)</b>              | 9.6      | 9.7      | 8.9      | 9.3      | 9.5      | 9.8      | 9.3      | 9.4      | 9.7      |
| <b>P (mg dL<sup>-1</sup>)</b>               | 3.8      | 3.6      | 3.3      | 2.9      | 4        | 3.5      | 4.4      | 3.7      | 3.7      |
| <b>Glucose (mg dL<sup>-1</sup>)</b>         | 94       | 95       | 98       | 98       | 117      | 101      | 103      | 105      | 92       |
| <b>BUN (mg dL<sup>-1</sup>)</b>             | 16.5     | 7.6      | 8.1      | 12.6     | 10.2     | 12.8     | 12.2     | 14.1     | 12.9     |
| <b>Cr (mg dL<sup>-1</sup>)</b>              | 0.79     | 0.86     | 0.83     | 0.86     | 0.65     | 0.94     | 0.9      | 0.69     | 0.67     |
| <b>Uric acid (mg dL<sup>-1</sup>)</b>       | 6        | 4.8      | 5.9      | 5.4      | 5        | 7.2      | 5.5      | 5.1      | 4.7      |
| <b>Cholesterol (mg dL<sup>-1</sup>)</b>     | 133      | 154      | 139      | 212      | 211      | 281      | 209      | 180      | 219      |
| <b>Total protein (g dL<sup>-1</sup>)</b>    | 7.2      | 7.3      | 6.9      | 6.8      | 6.4      | 7.7      | 7.3      | 7.4      | 7.1      |
| <b>Albumin (g dL<sup>-1</sup>)</b>          | 4.7      | 4.9      | 4.5      | 4.4      | 4.5      | 4.6      | 4.6      | 4.7      | 4.6      |
| <b>ALP (IU L<sup>-1</sup>)</b>              | 79       | 72       | 70       | 81       | 64       | 51       | 36       | 69       | 64       |
| <b>AST (IU L<sup>-1</sup>)</b>              | 16       | 14       | 13       | 17       | 21       | 29       | 14       | 26       | 17       |
| <b>ALT (IU L<sup>-1</sup>)</b>              | 19       | 12       | 12       | 34       | 11       | 29       | 12       | 20       | 13       |
| <b>Bilirubin (mg dL<sup>-1</sup>)</b>       | 1.2      | 1        | 0.6      | 0.9      | 0.6      | 0.8      | 0.9      | 1.3      | 0.8      |
| <b>gamma-GTP (IU L<sup>-1</sup>)</b>        | 25       | 15       | 22       | 42       | 22       | 32       | 9        | 19       | 12       |
| <b>TG (mg dL<sup>-1</sup>)</b>              | 78       | 71       | 146      | 461      | 95       | 112      | 116      | 180      | 100      |
| <b>HDL cholesterol (mg dL<sup>-1</sup>)</b> | 44       | 62       | 36       | 37       | 43       | 68       | 51       | 50       | 75       |
| <b>LDL cholesterol (mg dL<sup>-1</sup>)</b> | 78       | 81       | 85       | 89       | 142      | 194      | 137      | 104      | 118      |
| <b>Na (mmol L<sup>-1</sup>)</b>             | 142      | 142      | 143      | 140      | 142      | 141      | 140      | 143      | 142      |
| <b>K (mmol L<sup>-1</sup>)</b>              | 4.4      | 4        | 4.9      | 4.6      | 4.5      | 4.7      | 4.2      | 4.5      | 4.7      |
| <b>Cl (mmol L<sup>-1</sup>)</b>             | 102      | 100      | 105      | 102      | 102      | 100      | 101      | 103      | 101      |

|                                                     |      |      |      |      |      |      |       |       |      |
|-----------------------------------------------------|------|------|------|------|------|------|-------|-------|------|
| <b>PT (Sec)</b>                                     | 11.5 | 12   | 11.2 | 10.7 | 10.6 | 10.5 | 11.6  | 10.5  | 10.4 |
| <b>PT (%)</b>                                       | 98   | 92   | 100  | 100  | 100  | 100  | 91    | 100   | 100  |
| <b>PTT (sec)</b>                                    | 37.3 | 32.7 | 33.4 | 29.3 | 29.8 | 29.6 | 32.7  | 31.2  | 31.2 |
| <b>Portal vein serotonin (ng ml<sup>-1</sup>)</b>   | 5.3  | 17.1 | 29.6 | 90.6 | 1.8  | 91   | 227.6 | 101.6 | 9.1  |
| <b>Systemic vein serotonin (ng ml<sup>-1</sup>)</b> | 2.6  | 14.6 | 18.9 | 15.3 | 0.8  | 55.5 | 99.3  | 16.7  | 5.5  |
| <b>Portal vein/systemic vein serotonin</b>          | 2.04 | 1.17 | 1.57 | 5.92 | 2.25 | 1.64 | 2.29  | 6.08  | 1.65 |
| <b>Fibroscan LSM (kPa)</b>                          | 5.3  | 4.9  | 3.1  | 4.6  | 4.9  | 3.6  | 4.6   | 4.5   | 8.5  |
| <b>Fibroscan CAP (dB m<sup>-1</sup>)</b>            | 237  | 213  | 238  | 279  | 213  | 211  | 244   | 226   | 214  |

BMI, body mass index; Hb, hemoglobin; Seg, segmented neutrophil; Lymph, lymphocyte; PLT, platelet; BUN, blood urea nitrogen; ALP, alkaline phosphatase; AST, aspartate transferase; ALT, alanine transferase; TG, triacylglycerol; HDL, high-density lipoprotein; LDL, low-density lipoprotein; PT, prothrombin time; PTT, partial thromboplastin time; LSM, liver stiffness measure; CAP, controlled attenuation parameter.
